# Supplementary material for: Cardiac Optogenetics: Enhancement by All-trans-Retinal
Source: PubMed Central journal article supplement (PMC4644984; doi:10.1038/srep16542), 2015-11-16
Supplement: srep16542-s1.pdf [file srep16542-s1.pdf]

# Cardiac Optogenetics: Enhancement by All-Trans-Retinal

Jinzhu Yu, BS<sup>#</sup>, Kay Chen, BS<sup>#</sup>, Rachel V. Lucero, Christina M. Ambrosi, PhD,  
and Emilia Entcheva, PhD\*

Department of Biomedical Engineering, Stony Brook University, Stony Brook, NY

## Supplemental Information for Yu et al.

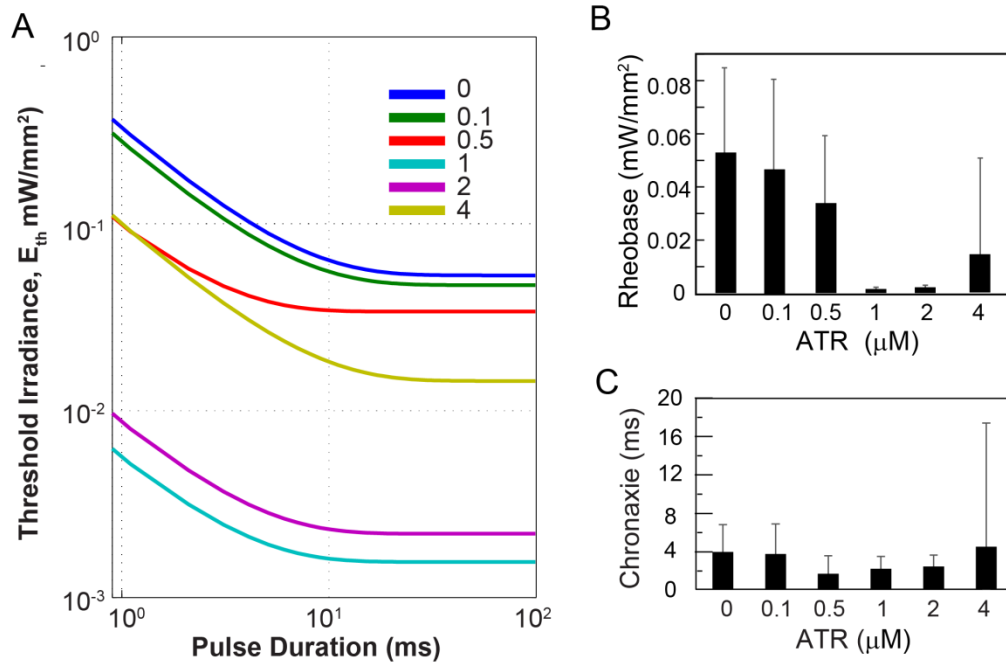

**Supplemental Figure S1. Parameter fits to the strength-duration data in Fig 3.** (A) Using the Matlab curve fitting tool box, fitting to the model  $\frac{Rheobase}{1 - e^{-\frac{-x \log(2)}{chronaxie}}}$  was completed within  $4 \times 10^6$  iterations and termination tolerance =  $10^{11}$ . (B) Fitted rheobase with 95% confidence intervals (CI). The CIs of 1 and 2  $\mu$ M groups do not have any overlap with that of other concentrations. (C) Fitted chronaxie with 95% confidence intervals.

**Supplemental Table S1. Outcome of statistical analysis of data from Fig 3 – significant differences indicated.** The two factors are pulse duration and ATR concentration. (\*) denotes a significant difference, detected in pair-wise comparisons after Tukey-Kramer post hoc correction and by non-overlapping confidence intervals with  $\alpha$  level set at 5%. Since all pulse duration comparisons share the same pattern of significance (except 1 ms), comparisons among ATR concentration are listed in the table. The 1ms group did not achieve significant difference from the 0.5  $\mu$ M condition.

|     | 0 | 0.1 | 0.5 | 1 | 2 | 4 |
|-----|---|-----|-----|---|---|---|
| 0   |   |     |     | * | * | * |
| 0.1 |   |     |     | * | * |   |
| 0.5 |   |     |     | * | * |   |
| 1   | * | *   | *   |   |   | * |
| 2   | * | *   | *   |   |   | * |
| 4   | * |     |     | * | * |   |
